# Supplementary material for: Immunomodulatory zymosan/ι-carrageenan/ agarose hydrogel for targeting M2 to M1 macrophages (antitumoral)
Source: Royal Society of Chemistry journal article supplement (doi:10.1039/d3ra06978h), 2024-01-01
Supplement: d3ra06978h1.pdf [file d3ra06978h1.pdf]

## Supplementary material

### **Immunomodulatory Zymosan/I-carrageenan/ Agarose hydrogel for targeting M2 to M1 macrophages (antitumoral)**

Geetha Venkatachalam<sup>1</sup>, Jayant Giri<sup>2</sup>, Saurav Mallik<sup>3</sup>, Zhongming Zhao<sup>4</sup>, Gandarvakottai Senthilkumar Arumugam<sup>1</sup>, Manavalan Arulmani<sup>5</sup>, Vimal Kumar Dewangan<sup>6</sup>, Mukesh Doble<sup>1, 5</sup>

<sup>1</sup> Bioengineering and Drug design Lab, Department of Biotechnology, Indian Institute of Technology Madras, Chennai, 600036, Tamilnadu, India.

<sup>2</sup> Department of Mechanical Engineering, Yeshwantrao Chavan College of Engineering Nagpur, India.

<sup>3</sup> Department of Environmental Health, Harvard T H Chan School of Public Health, Boston, MA, USA.

<sup>4</sup>The University of Texas Health Science Center at Houston, USA.

<sup>5</sup> Department of Cariology, Saveetha Dental College, SIMATS, Chennai, 600077, Tamilnadu, India.

<sup>6</sup> Department of Metallurgical and Materials Engineering, Indian Institute of Technology Madras, Chennai, 600036, India.

### **Email correspondence to**

Dr. Mukesh Doble

[mukeshdoble.sdc@saveetha.com](mailto:mukeshdoble.sdc@saveetha.com), [mukeshd@iitm.ac.in](mailto:mukeshd@iitm.ac.in) India

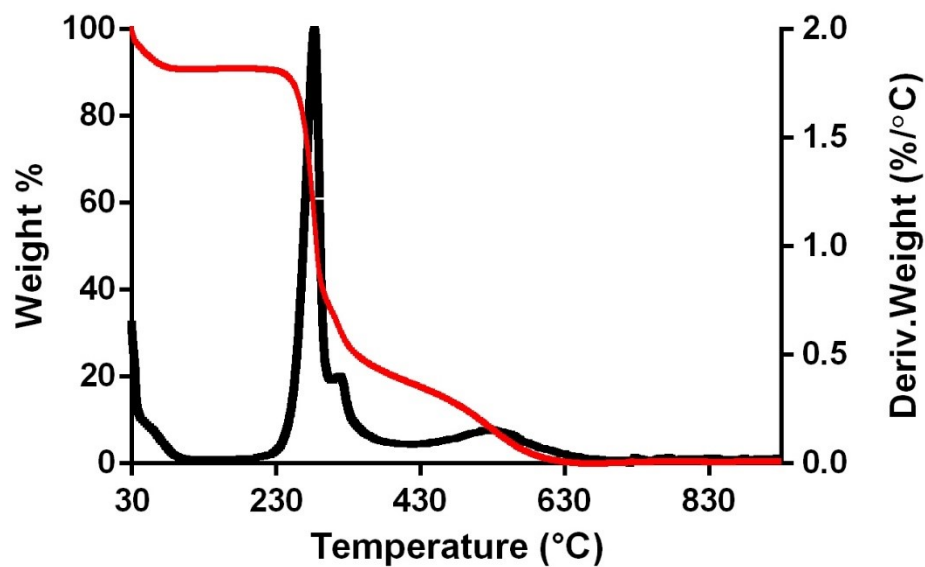

Fig. S1. Thermal gravimetric spectrum of native ZM.

**Table S1. M1 and M2 gene primers**

TNF $\alpha$

|         |                               |
|---------|-------------------------------|
| Forward | 5'- CCCTGGTATGAGCCCATCTATC-3' |
| Reverse | 5'- AAAGTAGACCTGCCCAGACTCG-3' |

CXCL10

|         |                                |
|---------|--------------------------------|
| Forward | 5'- GGCATTCAAGGAGTACCTCTCTC-3' |
| Reverse | 5'- GACAAAATTGGCTTGCAGGA-3'    |

CCL22

|         |                              |
|---------|------------------------------|
| Forward | 5'-TGCGCGTGGTGAAACACTT-3'    |
| Reverse | 5'-TAGGCTCTTCATTGGCTCAGCT-3' |

IL10

|         |                                |
|---------|--------------------------------|
| Forward | 5'- TCAAGGCGCATGTGAACTCC-3'    |
| Reverse | 5'- GATGTCAAACCTCACTCATGGCT-3' |

CCL18

|         |                              |
|---------|------------------------------|
| Forward | 5'-CTCTGCTGCCTCGTCTATACCT-3' |
| Reverse | 5'-CTTGGTTAGGAGGATGACACCT-3' |

## TLR2

Forward 5'-ACAGCACTGGTGTCTGGCAT- 3'

Reverse 5'-TGGGAGCTTTCCTGGGCTTC- 3'

## GAPDH

Forward 5'- GTCTCCTCTGACTTCAACAGCG-3'

Reverse 5'- ACCACCCTGTTGCTGTAGCCAA-3'

**Table. S2. Different ratios of polymer and its characteristics**

| Ratios of Polymer | Stiffness | Elasticity | Strength  | Pore size              | Biocompatibility | Biodegradation |
|-------------------|-----------|------------|-----------|------------------------|------------------|----------------|
| C1                | Low       | Low        | Average   | Irregular              | Good             | Good           |
| C2                | Average   | Low        | Average   | Not uniform            | Good             | Good           |
| C3                | Good      | Good       | Excellent | Uniform and Oval pores | Good             | Excellent      |

### **S3. Video abstracts**

#### **Rho B-tagged ZM uptake by Raw cells, a live video clip from a Olympus Magcam DC 10 Microscopy.**

Raw 264.7 cells with a concentration of  $1 \times 10^5$  cells/mL were grown in 6 well plate and treated with 100µg/ml of Rho B-tagged ZM particles for 4 h in a CO<sub>2</sub> incubator. To check the particle uptake by the cells it was viewed under the Olympus Magcam DC 10 Microscopy. During the 4 h incubation the particle uptake by the cell were viewed directly and a video clip 1.34 minutes were taken which is a proof to confirm the ZM particles entry to Raw 264.7 cells. ZM could be a potential candidate for macrophage targeted drug delivery.

<https://drive.google.com/file/d/1BA0WBwGwotTYibnQ-EYeuDTHbj3aqTGS/view?usp=sharing>
